# Supplementary material for: Piezoelectric nanogenerator induced work function on a metal phenolic coordination framework from copper oxide nanospheres for efficient biomechanical energy harvesting and physiological monitoring
Source: Royal Society of Chemistry journal article supplement (doi:10.1039/d2tc03396h), 2022-01-01
Supplement: d2tc03396h1.pdf [file d2tc03396h1.pdf]

## Supporting Information

### **Piezoelectric nanogenerator induced work function on metal phenolic coordination framework from copper oxide nanosphere for efficient biomechanical energy harvesting and physiological monitoring**

Ayyanu Ravikumar <sup>1,2,3</sup>, Vishal Natraj <sup>4</sup>, Yuvaraj Sivalingam <sup>4</sup>\*, Velappa Jayaraman Surya<sup>5</sup>,  
Fengjiao Zheng <sup>7</sup>, Huijun Wang <sup>3\*</sup>, Qingfeng Du <sup>3\*</sup>, Nan Liu <sup>1,2,3</sup>\*

<sup>1</sup> Institute of Chronic Disease Risks Assessment, School of Nursing and Health, Henan University, Kaifeng, 475004, P. R. China

<sup>2</sup> Institute of Environment and Health, South China Hospital, Health Science Center, Shenzhen University, Shenzhen, 518116, P. R. China

<sup>3</sup> General Practice Center, The Seventh Affiliated Hospital, Southern Medical University, Foshan, 528244, P. R. China

<sup>4</sup> Laboratory of Sensors, Energy and Electronic Devices (Lab SEED), Department of Physics and Nanotechnology, SRM Institute of Science and Technology, Kattankulathur-603203, Tamil Nadu, India

<sup>5</sup> Novel, Advanced, and Applied Materials (NAAM) laboratory, Department of Physics and Nanotechnology, SRM Institute of Science and Technology, Kattankulathur-603203, Tamil Nadu, India

<sup>6</sup> New Industry Creation Hatchery Center, Tohoku University, Aoba-Ku, Miyagi, Sendai 980-8579, Japan

<sup>7</sup> Department of Clinical Laboratory, The Air Force Hospital of Southern Theater Command of PLA, Guangzhou, 510602, P. R. China

## Corresponding authors

\* Nan Liu, [13688869875@163.com](mailto:13688869875@163.com)

\*Yuvaraj Sivalingam, [yuvarajs2@srmist.edu.in](mailto:yuvarajs2@srmist.edu.in)

\* Qingfeng Du, [nhyyqk@126.com](mailto:nhyyqk@126.com)

## ORCID

Yuvaraj Sivalingam: 0000-0002-2079-1570

Fengjiao Zheng: 0000-0002-6966-0870

Nan Liu: 0000-0002-8895-3169

## Supporting Figures

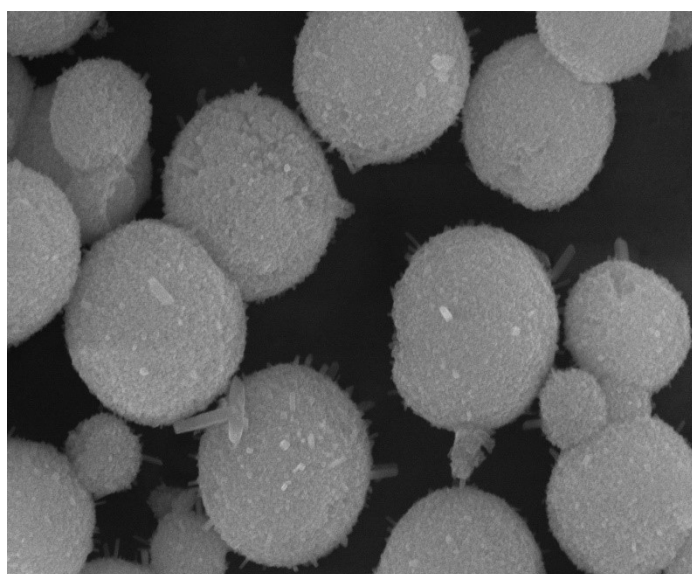

Figure S1. The SEM images of CuO nanospheres.

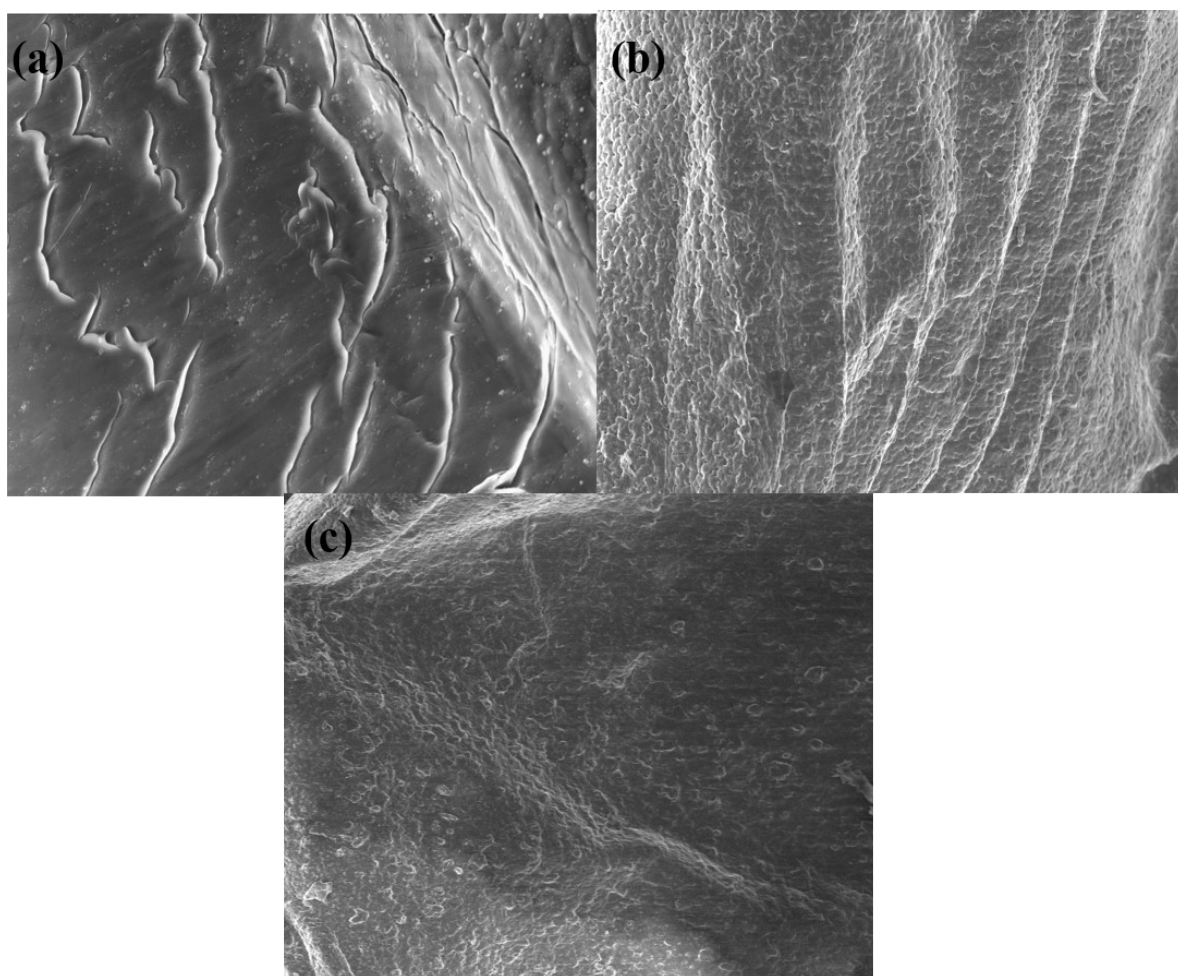

Figure S2 The SEM image of (a) PVDF, (b) CuO-TA-PVDF composite, (c) Cu-TA-PVDF composite.

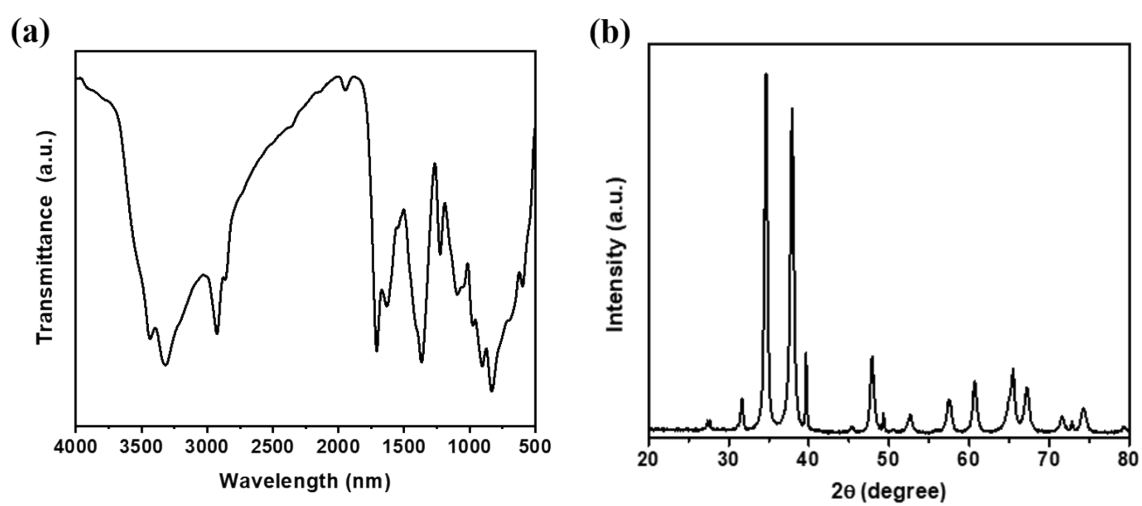

Figure S3 The FT-IR spectra (a) and XRD image (b) of CuO nanosphere.

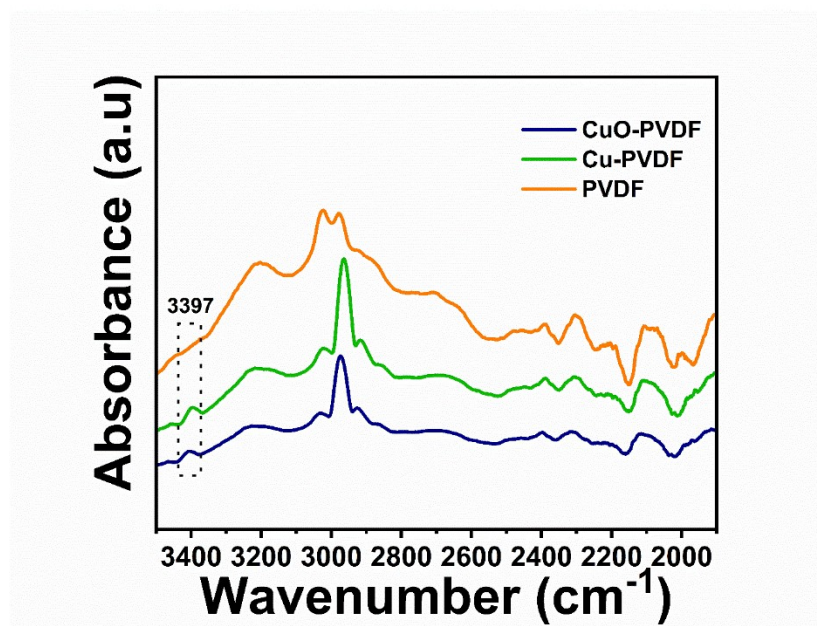

Figure S4 The FT-IR spectra of PVDF, Cu-TA-PVDF and CuO-TA-PVDF.

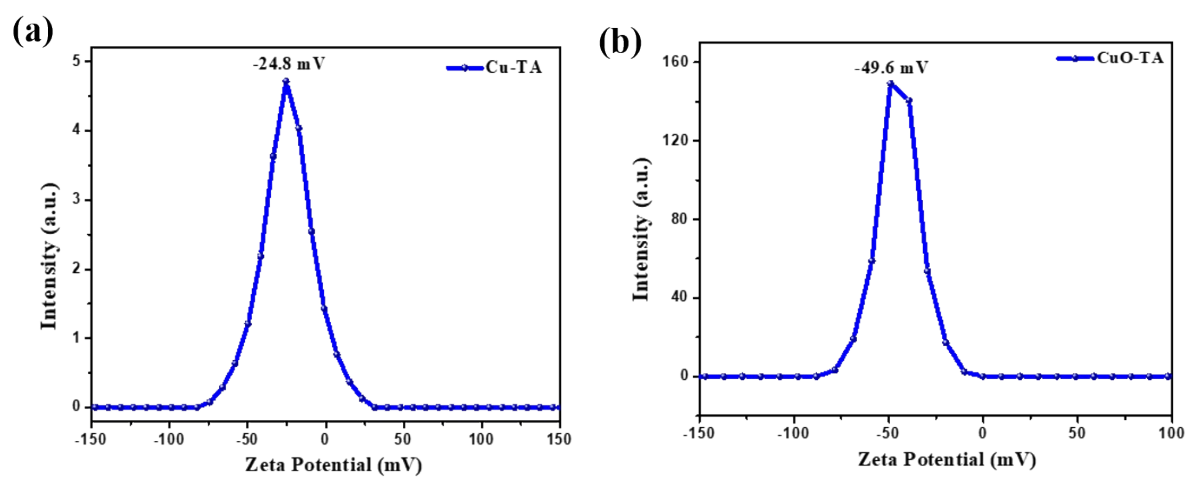

Figure S5 The Zeta-potential of (a) Cu-TA nanocubes and (b) CuO-TA nanosheets.

(a)

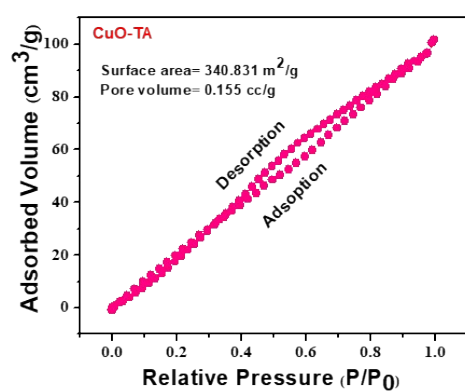

(b)

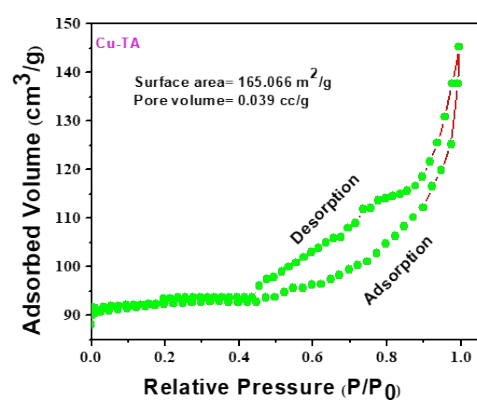

Figure S6 N<sub>2</sub> adsorption-desorption isotherm of (a) CuO-TA nanosheet and (b) Cu-TA nanocubes.

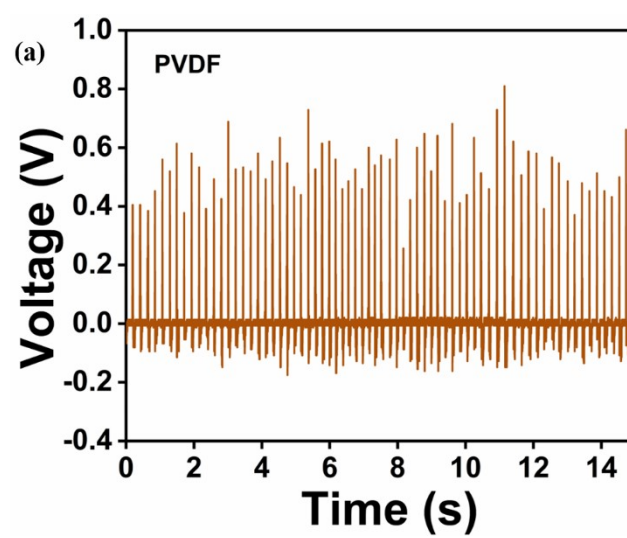

Figure S7 Output voltage recorded for bare PVDF based PNG.

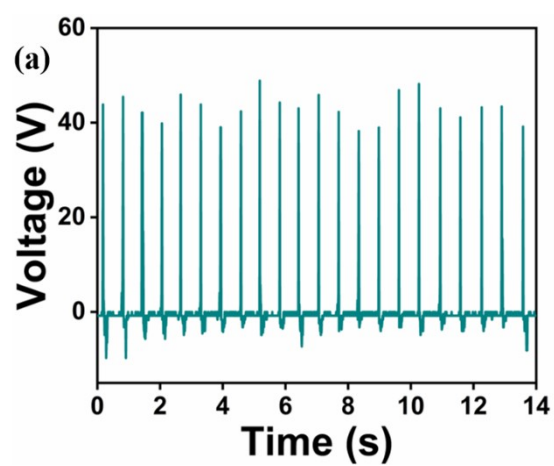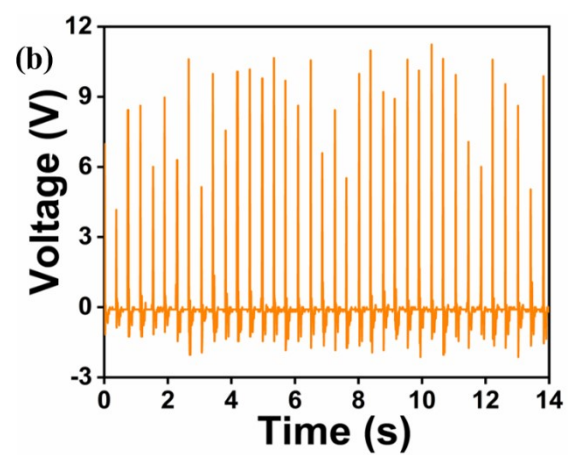

Figure S8 Output voltage responses of (a) CuO-TA PNG without PP tape, (b) Cu-TA PNG without PP tape.

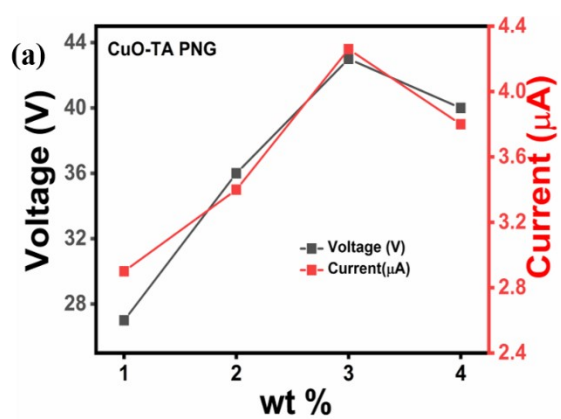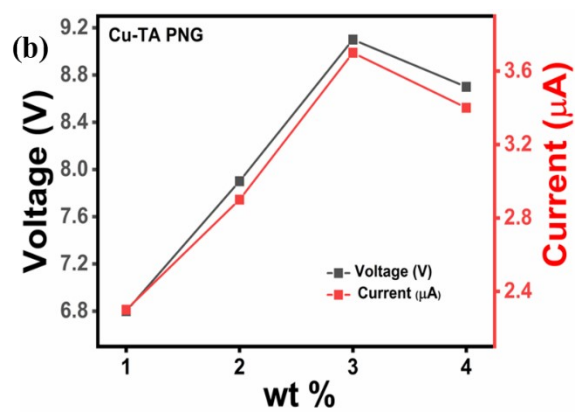

Figure S9 Weight percentage depends on current and voltage outputs in (a) CuO-TA PNG, (b) Cu-TA PNG.

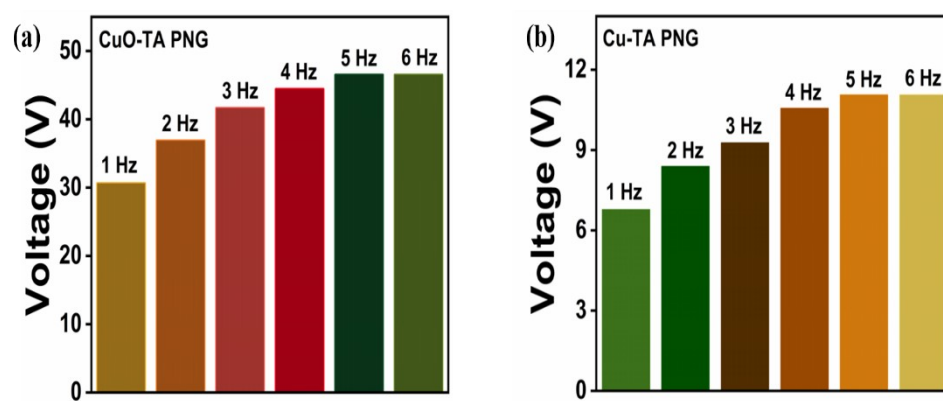

Figure S10. Frequency dependent voltage variation of (a) CuO-TA PNG, (b) Cu-TA PNG

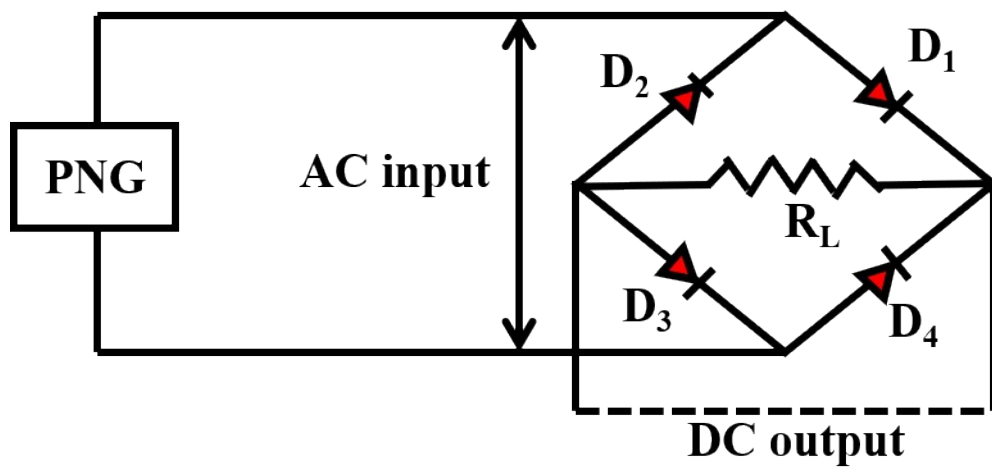

Figure S11: Circuit diagram for rectification of the output signal of the PNG.

The relative beta phase proportion in Cu-TA/PVDF and CuO-TA/PVDF nanocomposites were calculated from the FTIR spectra using the formula:

$$F_{\beta} = \frac{A_{\beta}}{\left(\frac{K_{\beta}}{K_{\alpha}}\right)A_{\alpha} + A_{\beta}}$$

Wherein,  $A_\alpha$  and  $A_\beta$  denote the absorbance values of alpha and beta phases respectively.  $K_\alpha$  and  $K_\beta$  represents the absorption coefficients with the value of  $6.1 \times 10^4$  and  $7.7 \times 10^4 \text{ cm}^{-1}/\text{mol}$ .

Using the above formula,  $F_\beta$  values for Cu-TA/PVDF and CuO-TA/PVDF nanocomposites were calculated to be 80.89% and 89.18% respectively.

### **Supporting videos**

**Video S1:** Charging of 3.3  $\mu\text{F}$  capacitor by finger tapping.

**Video S2:** Powering a buzzer using CuO-TA PNG.

**Video S3:** Lighting up six yellow LEDs in series using CuO-TA PNG.
